# Supplementary material for: Pressure-induced superconductivity in van der Waals layered semiconductor SnPSe3
Source: Royal Society of Chemistry journal article supplement (doi:10.1039/d3tc04196d), 2024-01-01
Supplement: d3tc04196d1.pdf [file d3tc04196d1.pdf]

**Supplementary Materials for**  
**Pressure-induced superconductivity in van der Waals layered**  
**semiconductor SnPSe<sub>3</sub>**

Mengyao Qi,<sup>†\*a</sup> Weifang Chen,<sup>†a</sup> Yanping Huang,<sup>a</sup> Hao Song,<sup>a</sup> Xindeng Lv,<sup>a</sup> Ming Wu,<sup>a</sup> Wendi Zhao,<sup>a</sup>  
Lili Zhang<sup>b</sup> and Tian Cui<sup>\*ac</sup>

---

<sup>a</sup> *Institutes of High-Pressure Physical, School of Physical Scientific and Technology, Ningbo University, Ningbo, Zhejiang 315211, China.*

<sup>b</sup> *Shanghai Synchrotron Radiation Facility, Shanghai Advanced Research Institute, Chinese Academy of Sciences, Shanghai 201204, China.*

<sup>c</sup> *Synergetic Extreme Condition High-pressure Science Center, State Key Laboratory of Superhard Materials, College of Physics, Jilin University, Changchun, Jilin 130012, China.*

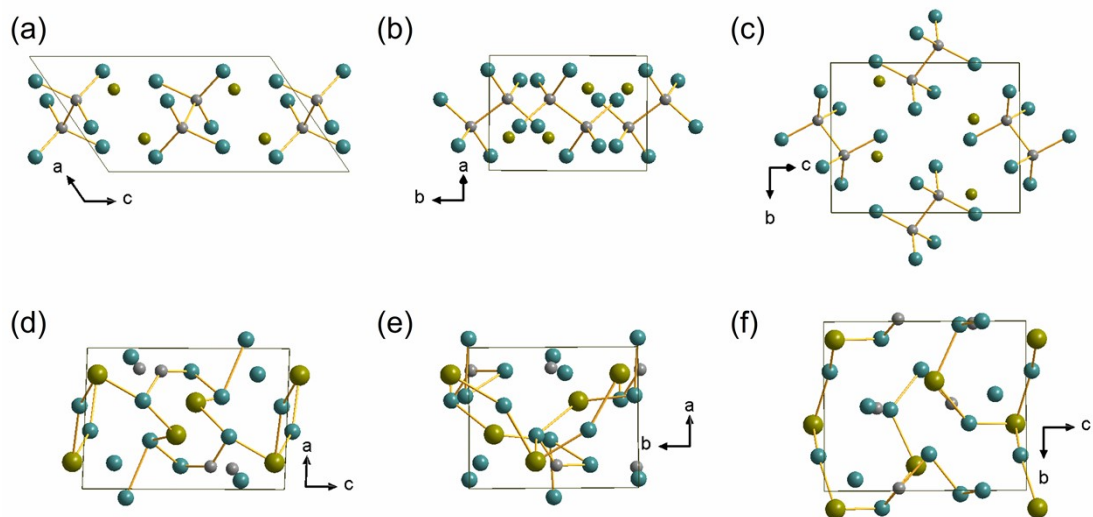

Fig. S1. Schematic crystal structures of  $\text{SnPSe}_3$ . (a-c): low-pressure phase (S.G.  $P2_1/c$ ). (d-f): high-pressure phase (S.G.  $P2_1$ ). Sn, P, and Se are represented by yellow, gray, and blue spheres, respectively.

Table S1. Crystal data of SnPSe<sub>3</sub> at 20.5 GPa:

|                           | Low-pressure phase      | High-pressure phase   |
|---------------------------|-------------------------|-----------------------|
| Crystal system            | Monoclinic              | Monoclinic            |
| Space group               | <i>P2<sub>1</sub>/c</i> | <i>P2<sub>1</sub></i> |
| <i>a</i> , Å              | 6.228(1)                | 6.209(4)              |
| <i>b</i> , Å              | 7.168(4)                | 7.448(5)              |
| <i>c</i> , Å              | 11.01(4)                | 8.899(7)              |
| $\beta$ , (°)             | 122.82(4)               | 88.12(4)              |
| <i>V</i> , Å <sup>3</sup> | 413.06(3)               | 411.31(4)             |
| <i>Z</i>                  | 4                       | 4                     |

Table S2. Unit-cell parameters of SnPSe<sub>3</sub> at various pressures:

| <i>P</i> (GPa) | Low-pressure phase |              |              |                            | High-pressure phase |              |              |                            |
|----------------|--------------------|--------------|--------------|----------------------------|---------------------|--------------|--------------|----------------------------|
|                | <i>a</i> (Å)       | <i>b</i> (Å) | <i>c</i> (Å) | <i>V</i> (Å <sup>3</sup> ) | <i>a</i> (Å)        | <i>b</i> (Å) | <i>c</i> (Å) | <i>V</i> (Å <sup>3</sup> ) |
| 0.1            | 6.83(1)            | 7.68(9)      | 11.73(3)     | 507.88(9)                  |                     |              |              |                            |
| 2.0            | 6.76(3)            | 7.59(5)      | 11.65(0)     | 494.00(9)                  |                     |              |              |                            |
| 4.6            | 6.69(0)            | 7.53(9)      | 11.57(5)     | 482.07(2)                  |                     |              |              |                            |
| 5.8            | 6.65(5)            | 7.51(5)      | 11.52(3)     | 474.50(1)                  |                     |              |              |                            |
| 7.4            | 6.62(1)            | 7.47(7)      | 11.48(3)     | 469.62(0)                  |                     |              |              |                            |
| 9.1            | 6.56(5)            | 7.41(5)      | 11.45(0)     | 460.39(7)                  |                     |              |              |                            |
| 11.0           | 6.51(6)            | 7.38(6)      | 11.39(8)     | 453.96(5)                  |                     |              |              |                            |
| 13.6           | 6.45(2)            | 7.32 (1)     | 11.26(2)     | 440.90(0)                  | 6.31(0)             | 7.58(6)      | 9.10(5)      | 435.60(9)                  |
| 15.7           | 6.38(1)            | 7.26 (4)     | 11.15(1)     | 431.45(7)                  | 6.28(9)             | 7.51(9)      | 8.98(6)      | 424.73(2)                  |
| 17.1           | 6.33(4)            | 7.20 (6)     | 11.11(5)     | 424.32(1)                  | 6.24(8)             | 7.48(1)      | 8.95(9)      | 418.58(1)                  |
| 20.5           | 6.22(8)            | 7.16 (8)     | 11.01(3)     | 413.06(3)                  | 6.20 (9)            | 7.44 (8)     | 8.89 (9)     | 411.27(1)                  |
| 22.5           | 6.17(6)            | 7.11 (3)     | 10.92(9)     | 404.80(0)                  | 6.16(0)             | 7.42(9)      | 8.82(5)      | 403.63(4)                  |
| 25.4           | 6.13(9)            | 7.06 (7)     | 10.83(7)     | 397.26(2)                  | 6.10(5)             | 7.41(2)      | 8.71(1)      | 393.97(0)                  |
| 28.5           | 5.95(1)            | 7.01 (6)     | 10.65(9)     | 379.88(5)                  | 6.03(8)             | 7.40(9)      | 8.68(8)      | 388.61(1)                  |
